# Supplementary material
Source: PubMed Central journal article supplement (PMC7035586)
Supplement: DC190906SupplementaryData.pdf [file DC190906SupplementaryData.pdf]

SUPPLEMENTARY DATA

**Supplementary Figure 1.** Study enrollment flowchart for participants with type 1 diabetes, The Study of Longevity in Diabetes (SOLID)

SUPPLEMENTARY DATA

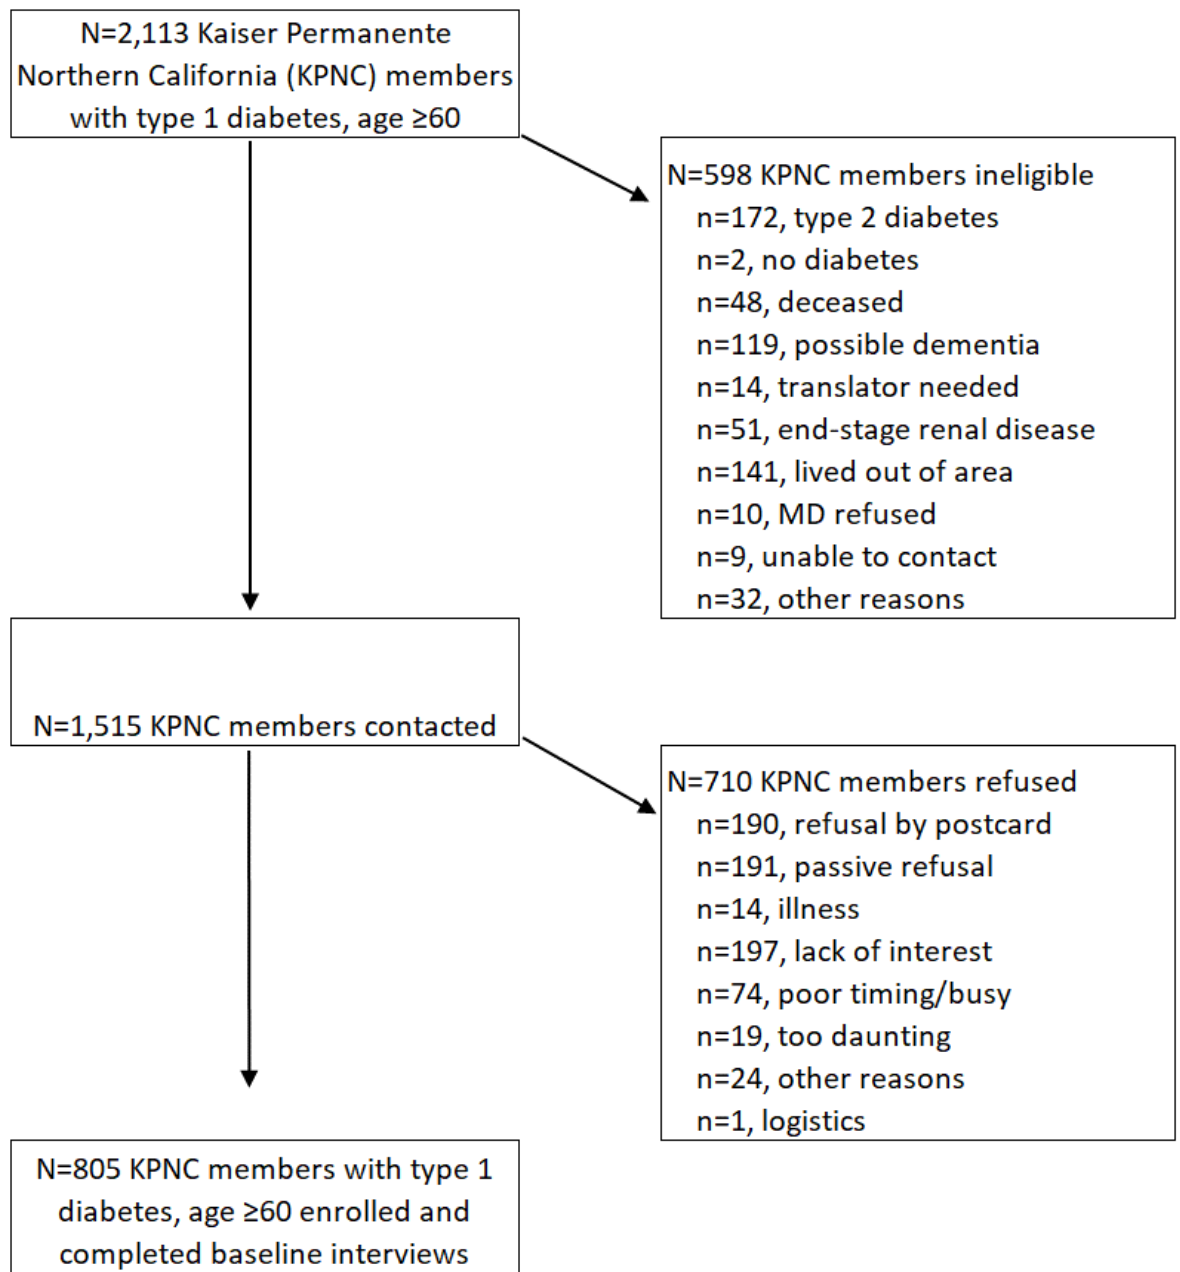

SUPPLEMENTARY DATA

**Supplementary Table 1.** Association between severe hypoglycemia and cognitive function among participants with no cognitive impairment at baseline

| Model outcome             | Exposure to recent SH                                 |                                                                                 | Exposure to lifetime SH                               |                                                                                 |
|---------------------------|-------------------------------------------------------|---------------------------------------------------------------------------------|-------------------------------------------------------|---------------------------------------------------------------------------------|
|                           | Model 1                                               | Model 2                                                                         | Model 1                                               | Model 2                                                                         |
|                           | Adjusted for age, sex, race, diagnosis age, education | Additional adjustment for depression, stress, sleep and alcohol use at baseline | Adjusted for age, sex, race, diagnosis age, education | Additional adjustment for depression, stress, sleep and alcohol use at baseline |
|                           | $\beta$ (95%CI)                                       | $\beta$ (95%CI)                                                                 | $\beta$ (95%CI)                                       | $\beta$ (95%CI)                                                                 |
| <b>Global cognition</b>   |                                                       |                                                                                 |                                                       |                                                                                 |
| 0 episodes                | REF                                                   | REF                                                                             | REF                                                   | REF                                                                             |
| 1-3 episodes              | -0.10 (-0.17, -0.03)                                  | -0.11 (-0.19, -0.04)                                                            | -0.08 (-0.15, -0.02)                                  | -0.09 (-0.15, -0.02)                                                            |
| $\geq 4$ episodes         | -0.08 (-0.20, 0.03)                                   | -0.10 (-0.21, 0.02)                                                             | -0.10 (-0.20, 0.003)                                  | -0.09 (-0.20, 0.01)                                                             |
| <b>Language</b>           |                                                       |                                                                                 |                                                       |                                                                                 |
| 0 episodes                | REF                                                   | REF                                                                             | REF                                                   | REF                                                                             |
| 1-3 episodes              | -0.12 (-0.23, -0.02)                                  | -0.14 (-0.25, -0.03)                                                            | -0.09 (-0.19, 0.01)                                   | -0.09 (-0.19, 0.01)                                                             |
| $\geq 4$ episodes         | -0.09 (-0.26, 0.09)                                   | -0.13 (-0.31, 0.04)                                                             | -0.08 (-0.23, 0.08)                                   | -0.03 (-0.19, 0.13)                                                             |
| <b>Executive function</b> |                                                       |                                                                                 |                                                       |                                                                                 |
| 0 episodes                | REF                                                   | REF                                                                             | REF                                                   | REF                                                                             |
| 1-3 episodes              | -0.13 (-0.22, -0.04)                                  | -0.15 (-0.24, -0.05)                                                            | -0.16 (-0.24, -0.08)                                  | -0.14 (-0.22, -0.05)                                                            |
| $\geq 4$ episodes         | -0.14 (-0.29, 0.01)                                   | -0.16 (-0.31, -0.02)                                                            | -0.20 (-0.33, -0.06)                                  | -0.17 (-0.30, -0.04)                                                            |
| <b>Episodic memory</b>    |                                                       |                                                                                 |                                                       |                                                                                 |
| 0 episodes                | REF                                                   | REF                                                                             | REF                                                   | REF                                                                             |
| 1-3 episodes              | -0.08 (-0.17, 0.02)                                   | -0.11 (-0.21, -0.01)                                                            | -0.02 (-0.11, 0.07)                                   | -0.02 (-0.11, 0.07)                                                             |
| $\geq 4$ episodes         | -0.29 (-0.45, -0.13)                                  | -0.29 (-0.45, -0.13)                                                            | -0.08 (-0.22, 0.06)                                   | -0.07 (-0.21, 0.08)                                                             |
| <b>Attention</b>          |                                                       |                                                                                 |                                                       |                                                                                 |
| 0 episodes                | REF                                                   | REF                                                                             | REF                                                   | REF                                                                             |
| 1-3 episodes              | -0.08 (-0.17, 0.02)                                   | -0.08 (-0.18, 0.02)                                                             | -0.12 (-0.20, -0.03)                                  | -0.12 (-0.20, -0.03)                                                            |
| $\geq 4$ episodes         | -0.08 (-0.23, 0.08)                                   | -0.09 (-0.24, 0.06)                                                             | -0.16 (-0.30, -0.03)                                  | -0.13 (-0.27, 0.02)                                                             |

Supplemental Table 1 Footnote: Multivariable linear regression models examining the association between recent severe hypoglycemia (past-12 month) and lifetime severe hypoglycemia (resulting in emergency department or inpatient utilization) among the subset of participants without cognitive impairment at baseline (defined as cognitive scores 1.5 SD below the population mean for the global and domain-specific scores).

SUPPLEMENTARY DATA

**Supplementary Table 2.** Association between recent severe hypoglycemia and cognition independent of lifetime hypoglycemia exposure

| Model outcome      | Cognitive performance | Cognitive impairment (1.5 SD below mean) |
|--------------------|-----------------------|------------------------------------------|
|                    | $\beta$ (95%CI)       | OR (95%CI)                               |
| Global cognition   |                       |                                          |
| No exposure        | REF                   | REF                                      |
| 1-3 episodes       | -0.09 (-0.17, -0.01)  | 1.36 (0.66, 2.82)                        |
| $\geq 4$ episodes  | -0.18 (-0.31, -0.06)  | 2.88 (1.15, 7.25)                        |
| Language           |                       |                                          |
| No exposure        | REF                   | REF                                      |
| 1-3 episodes       | -0.12 (-0.24, -0.004) | 1.62 (0.74, 3.54)                        |
| $\geq 4$ episodes  | -0.22 (-0.40, -0.03)  | 3.00 (1.12, 8.07)                        |
| Executive function |                       |                                          |
| No exposure        | REF                   | REF                                      |
| 1-3 episodes       | -0.10 (-0.22, 0.02)   | 0.88 (-.43, 1.81)                        |
| $\geq 4$ episodes  | -0.20 (-0.39, -0.01)  | 1.77 (0.70, 4.45)                        |
| Episodic memory    |                       |                                          |
| No exposure        | REF                   | REF                                      |
| 1-3 episodes       | -0.08 (-0.19, 0.04)   | 1.15 (0.59, 2.25)                        |
| $\geq 4$ episodes  | -0.30 (-0.49, -0.02)  | 1.83 (0.68, 4.89)                        |
| Attention          |                       |                                          |
| No exposure        | REF                   | REF                                      |
| 1-3 episodes       | -0.08 (-0.22, 0.06)   | 0.99 (0.49, 2.02)                        |
| $\geq 4$ episodes  | -0.07 (-0.30, 0.15)   | 1.29 (0.42, 3.98)                        |

Supplemental Table 1 Footnote: All models adjusted for age at baseline interview, sex, race/ethnicity, education, diabetes duration, and lifetime exposure to SH resulting in hospitalization or ED utilization
